# Supplementary material for: Retracted Article: Mechanistic insights into the decontamination of Th(iv) on graphene oxide-based composites by EXAFS and modeling techniques
Source: Royal Society of Chemistry journal article supplement (doi:10.1039/c6en00470a), 2016-11-10
Supplement: c6en00470a1.pdf [file c6en00470a1.pdf]

---

**Supporting Information (SI) on**  
**Mechanistic insights on the decontamination of Th(IV) on graphene**  
**oxide-based composites by EXAFS and modeling techniques**

**Yubing Sun<sup>a,b,\*</sup>, Xiangxue Wang<sup>a,c</sup>, Wencheng Song<sup>b</sup>, Songhua Lu<sup>a</sup>, Changlun  
Chen<sup>a</sup>, Xiangke Wang<sup>b,c,d</sup>**

<sup>a</sup> *Institute of Plasma Physics, Chinese Academy of Sciences, P.O. Box 1126, Hefei,  
230031, Anhui, P.R. China*

<sup>b</sup> *School of Environment and Chemical Engineering, North China Electric Power  
University, Beijing 102206, P.R. China*

<sup>c</sup> *School for Radiological and Interdisciplinary Sciences, Soochow University and  
Collaborative Innovation Center of Radiation Medicine of Jiangsu Higher Education  
Institutions, 215123, Suzhou, P.R. China*

<sup>d</sup> *NAAM Research Group, Faculty of Science, King Abdulaziz University, Jeddah  
21589, Saudi Arabia*

\*: Corresponding author. Phone: +86-551-65593308; Fax: +86-551-65591310; E-mail:  
[sunyb@ipp.ac.cn](mailto:sunyb@ipp.ac.cn) (Y. Sun).

Submitted to Environmental Science: Nano

Supplemental Information, 6 pages with 3 Figures and 4 Tables

**Pseudo-first-order and pseudo-second-order kinetic models.** The linear equations

of pseudo-first-order and pseudo-second-order kinetic models were described as Eqns.

(S1)<sup>S1</sup> and (S2)<sup>S2</sup>:

$$\ln(q_e - q_t) = \ln q_e - k_1 \times t \quad (\text{S1})$$

$$t/q_t = 1/(k_2 \times q_e^2) + t/q_e \quad (\text{S2})$$

where  $q_e$  and  $q_t$  (mg/g) are the amount of Th(IV) adsorbed at equilibrium and at time  $t$ , respectively.  $k_1$  and  $k_2$  are the pseudo-first-order and pseudo-second-order kinetic rate constants, respectively.

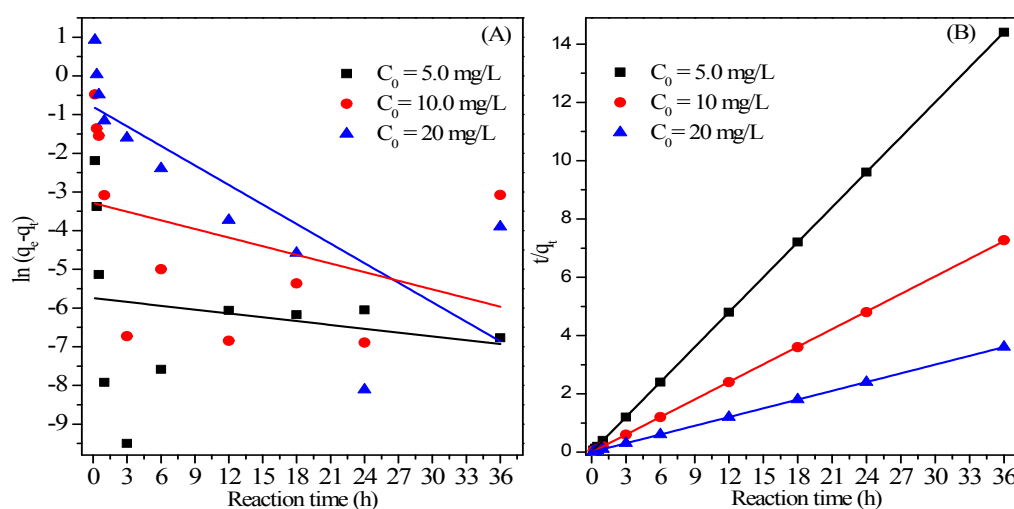

**Figure S1.** Adsorption kinetics of Th(IV) on amidoxime/graphene oxide composites fitted by pseudo- first-order (A) and pseudo-second-order (B) kinetic models

**Table S1** Optimized parameters of pseudo- and pseudo-second-order kinetic model

| $C_0$<br>(mg/L) | Pseudo-first-order kinetic model |                          |        | Pseudo-second-order kinetic model |                |       |
|-----------------|----------------------------------|--------------------------|--------|-----------------------------------|----------------|-------|
|                 | $q_e$ (mg/g)                     | $k_1$ (h <sup>-1</sup> ) | $R^2$  | $q_e$ (mg/g)                      | $k_2$ (g/mg/h) | $R^2$ |
| 5.0             | 0.0032                           | 0.033                    | 0.0362 | 2.498                             | 160.16         | 1     |
| 10.0            | 0.0374                           | 0.0744                   | 0.1406 | 4.97                              | 11.566         | 1     |
| 20.0            | 0.4501                           | 0.1684                   | 0.6044 | 10                                | 2.439          | 1     |

**Distribution of Th(IV) speciation.** The distribution of Th(IV) species under different pH conditions was simulated by Visual MINTEQL 2.6 mode.<sup>S3</sup>

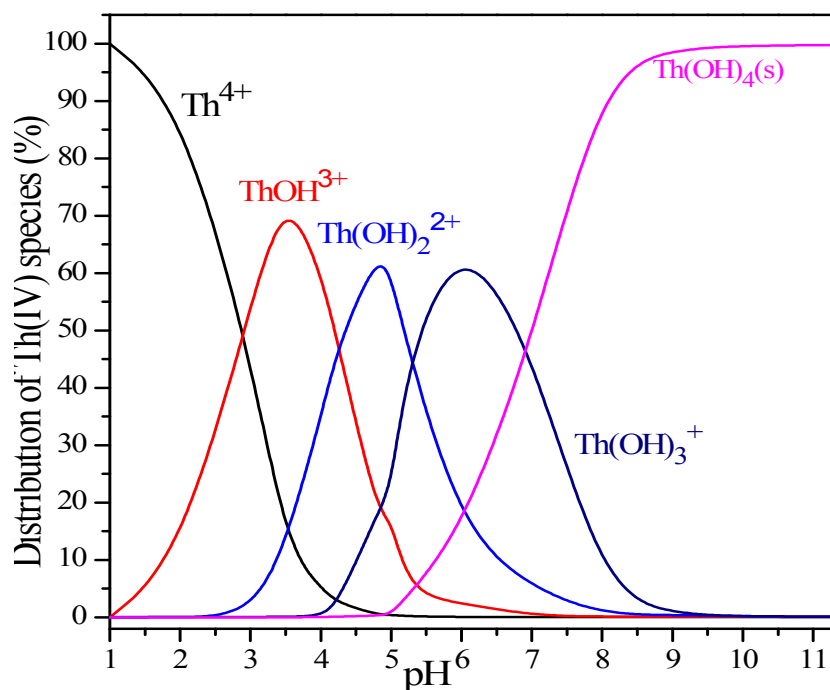

**Figure S2.** Distribution of Th(IV) species in aqueous solutions,  $C_0 = 10$  mg/L.

**Table S2.** The thermodynamic equilibrium parameters of Th(IV) in aqueous solutions

| Reactions                                                                                  | Log K  | Ref. |
|--------------------------------------------------------------------------------------------|--------|------|
| $\text{Th}^{4+} + \text{H}_2\text{O} = \text{ThOH}^{3+} + \text{H}^+$                      | -3.86  | (S4) |
| $\text{Th}^{4+} + 2\text{H}_2\text{O} = \text{Th}(\text{OH})_2^{2+} + 2\text{H}^+$         | -8.01  | (S4) |
| $\text{Th}^{4+} + 3\text{H}_2\text{O} = \text{Th}(\text{OH})_3^+ + 3\text{H}^+$            | -12.99 | (S4) |
| $\text{Th}^{4+} + 4\text{H}_2\text{O} = \text{Th}(\text{OH})_4^0(\text{aq}) + 4\text{H}^+$ | -17.16 | (S4) |

**Langmuir and Freundlich Equations.** The Langmuir and the Freundlich equation

can be expressed by Eqns. (S3)<sup>S5</sup> and (S4)<sup>S6</sup>:

$$\frac{C_e}{Q_e} = \frac{1}{Q_m \times K_L} + \frac{C_e}{Q_m} \quad (\text{S3})$$

$$Q_e = K_f \times C^n \quad (\text{S4})$$

where  $Q_e$  (mg/g) and  $C_e$  (mg/L) are the amount of adsorbed Th(IV) by amidoxime/graphene oxide composites and the equilibrium concentration in solution.  $K_f$  (mg<sup>1-n</sup>g<sup>-1</sup>L<sup>n</sup>) and  $n$  refer to an empirical constants related to adsorption capacity and the Freundlich exponent related to isotherm nonlinearity.

**Table S3.** Parameters of Langmuir and Freundlich models for Th(IV) adsorption on amidoxime/graphene oxide composites at pH 2.0 and  $I = 0.01$  mol/L NaCl

|       | Langmuir        |                     |       | Freundlich                              |       |       |
|-------|-----------------|---------------------|-------|-----------------------------------------|-------|-------|
|       | $K_a$<br>(L/mg) | $q_{max}$<br>(mg/g) | $R^2$ | $\ln K_F$<br>(mg/g)/(mg/g) <sup>n</sup> | $1/n$ | $R^2$ |
| 293 K | 1.095           | 123.46              | 0.996 | 4.08                                    | 0.405 | 0.987 |
| 313 K | 0.947           | 140.84              | 0.999 | 4.13                                    | 0.413 | 0.967 |
| 333 K | 0.859           | 163.93              | 0.999 | 4.24                                    | 0.403 | 0.967 |

**Calculation of Thermodynamic Parameters.** The thermodynamic parameters (e.g.,  $\Delta G^0$ ,  $\Delta H^0$  and  $\Delta S^0$ ) of Th(IV) sorption on amidoxime/graphene oxide composites were calculated by Eqns. (S5) and (S6):

$$\Delta G^0 = -RT \ln K_d^0 = \Delta H^0 - T \times \Delta S^0 \quad (\text{S5})$$

$$\ln K_d^0 = \frac{\Delta S^0}{R} - \frac{\Delta H^0}{RT} \quad (\text{S6})$$

where  $R$  and  $T$  are the ideal gas constant (8.314 J/(mol·K)) and temperature in Kelvin, respectively. The value of  $\ln K_d^0$  can be calculated from the plot of  $\ln K_d$  vs.  $1/T$  (Figure S3).

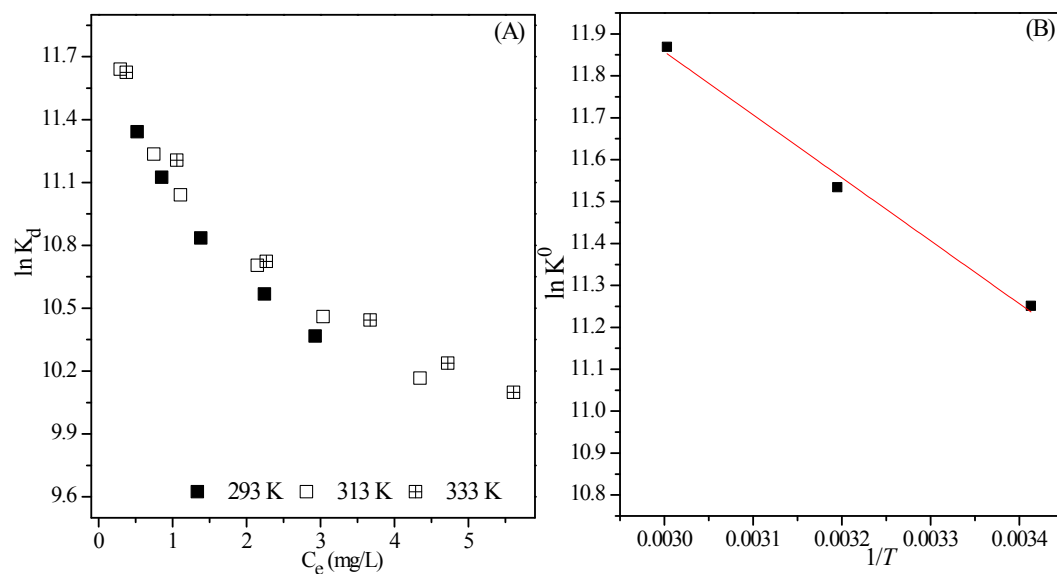

**Figure S3.** The plot of  $\ln K_d$  vs  $C_e$  (A) and  $\ln K^0$  vs  $1/T$  (B) of Th(IV) adsorption on amidoxime/ graphene oxide composites

**Table S4** Thermodynamic parameters of the adsorption of Th(IV) on amidoxime/ graphene oxide composites at pH 2.0 and  $I = 0.01$  mol/L NaCl

| Temperature | $\Delta G^0$ (kJ/mol) | $\Delta H^0$ (kJ/mol) | $\Delta S^0$ (J/(mol·K)) |
|-------------|-----------------------|-----------------------|--------------------------|
| 293 K       | -27.41                |                       |                          |
| 313 K       | -30.01                | 12.493                | 136.06                   |
| 333 K       | -32.86                |                       |                          |

## References

- S1. S. Lagergren, *Handlingar*, 1898, 24, 1-39.
- S2. Y. S. Ho and G. Mckay, *Chem. Eng. J.*, 1998, 70, 115-124.
- S3. H. P. van Leeuwen, Dynamic aspects of in situ speciation processes and techniques, In *In situ monitoring of aquatic systems chemical analysis and speciation*;

Buffle J., Horvai G., Eds, John Wiley and Sons, Chichester, 2000.

S4. L. Cromieres, V. Moulin, B. Fourest, R. Guillaumont and E. Giffaut, *Radiochim. Acta*, 1998, 82, 249-256.

S5. I. Langmuir, *J. Am. Chem. Soc.*, 1918, 40, 1361-1403.

S6 H. M. F. Freundlich, *J. Phys. Chem.*, 1906, 57, 385-470.
